# Supplementary material
Source: ML conference proceedings conference paper supplement (https://proceedings.neurips.cc/paper_files/paper/2022/hash/2a8e6c09a1fd747e43a74710c79efdd5-Abstract.html)
Supplement: Supplementary file 1 [file 2a8e6c09a1fd747e43a74710c79efdd5-Supplemental-Conference.zip]

Archive with 130 entries (118 files):
- appendix.pdf
- __MACOSX/._appendix.pdf
- p2c/
- __MACOSX/._p2c
- p2c/run_vivo_pretrain.py
- __MACOSX/p2c/._run_vivo_pretrain.py
- p2c/stage1.py
- __MACOSX/p2c/._stage1.py
- p2c/datasets/
- __MACOSX/p2c/._datasets
- p2c/__init__.py
- __MACOSX/p2c/.___init__.py
- p2c/utils/
- __MACOSX/p2c/._utils
- p2c/modeling/
- __MACOSX/p2c/._modeling
- p2c/readme.md
- __MACOSX/p2c/._readme.md
- p2c/scripts/
- __MACOSX/p2c/._scripts
- p2c/stage2.py
- __MACOSX/p2c/._stage2.py
- p2c/data/
- __MACOSX/p2c/._data
- p2c/run_captioning.py
- __MACOSX/p2c/._run_captioning.py
- p2c/datasets/build.py
- __MACOSX/p2c/datasets/._build.py
- p2c/datasets/__init__.py
- __MACOSX/p2c/datasets/.___init__.py
- p2c/datasets/oscar_tsv.py
- __MACOSX/p2c/datasets/._oscar_tsv.py
- p2c/datasets/vivo_tsv.py
- __MACOSX/p2c/datasets/._vivo_tsv.py
- p2c/datasets/rl_tsv.py
- __MACOSX/p2c/datasets/._rl_tsv.py
- p2c/utils/misc.py
- __MACOSX/p2c/utils/._misc.py
- p2c/utils/metric_logger.py
- __MACOSX/p2c/utils/._metric_logger.py
- p2c/utils/cider/
- __MACOSX/p2c/utils/._cider
- p2c/utils/caption_evaluate.py
- __MACOSX/p2c/utils/._caption_evaluate.py
- p2c/utils/tsv_file_ops.py
- __MACOSX/p2c/utils/._tsv_file_ops.py
- p2c/utils/__init__.py
- __MACOSX/p2c/utils/.___init__.py
- p2c/utils/logger.py
- __MACOSX/p2c/utils/._logger.py
- p2c/utils/cbs.py
- __MACOSX/p2c/utils/._cbs.py
- p2c/utils/task_utils.py
- __MACOSX/p2c/utils/._task_utils.py
- p2c/utils/tsv_file.py
- __MACOSX/p2c/utils/._tsv_file.py
- p2c/modeling/__init__.py
- __MACOSX/p2c/modeling/.___init__.py
- p2c/modeling/t5_utils.py
- __MACOSX/p2c/modeling/._t5_utils.py
- p2c/modeling/gumbel.py
- __MACOSX/p2c/modeling/._gumbel.py
- p2c/modeling/modeling_t5.py
- __MACOSX/p2c/modeling/._modeling_t5.py
- p2c/modeling/modeling_utils.py
- __MACOSX/p2c/modeling/._modeling_utils.py
- p2c/modeling/modeling_bert.py
- __MACOSX/p2c/modeling/._modeling_bert.py
- p2c/scripts/inference.sh
- __MACOSX/p2c/scripts/._inference.sh
- p2c/scripts/vivo.sh
- __MACOSX/p2c/scripts/._vivo.sh
- p2c/scripts/cbs.sh
- __MACOSX/p2c/scripts/._cbs.sh
- p2c/scripts/stage2.sh
- __MACOSX/p2c/scripts/._stage2.sh
- p2c/scripts/stage1.sh
- __MACOSX/p2c/scripts/._stage1.sh
- p2c/scripts/xe.sh
- __MACOSX/p2c/scripts/._xe.sh
- p2c/scripts/scst.sh
- __MACOSX/p2c/scripts/._scst.sh
- p2c/data/test.yaml
- __MACOSX/p2c/data/._test.yaml
- p2c/data/train.yaml
- __MACOSX/p2c/data/._train.yaml
- p2c/data/val.yaml
- __MACOSX/p2c/data/._val.yaml
- p2c/data/oi.yaml
- __MACOSX/p2c/data/._oi.yaml
- p2c/utils/cider/pyciderevalcap/
- __MACOSX/p2c/utils/cider/._pyciderevalcap
- p2c/utils/cider/pyciderevalcap/cider/
- __MACOSX/p2c/utils/cider/pyciderevalcap/._cider
- p2c/utils/cider/pyciderevalcap/__init__.py
- __MACOSX/p2c/utils/cider/pyciderevalcap/.___init__.py
- p2c/utils/cider/pyciderevalcap/__pycache__/
- __MACOSX/p2c/utils/cider/pyciderevalcap/.___pycache__
- p2c/utils/cider/pyciderevalcap/ciderD/
- __MACOSX/p2c/utils/cider/pyciderevalcap/._ciderD
- p2c/utils/cider/pyciderevalcap/cider/cider.py
- __MACOSX/p2c/utils/cider/pyciderevalcap/cider/._cider.py
- p2c/utils/cider/pyciderevalcap/cider/__init__.py
- __MACOSX/p2c/utils/cider/pyciderevalcap/cider/.___init__.py
- p2c/utils/cider/pyciderevalcap/cider/cider_scorer.py
- __MACOSX/p2c/utils/cider/pyciderevalcap/cider/._cider_scorer.py
- p2c/utils/cider/pyciderevalcap/__pycache__/__init__.cpython-38.pyc
- __MACOSX/p2c/utils/cider/pyciderevalcap/__pycache__/.___init__.cpython-38.pyc
- p2c/utils/cider/pyciderevalcap/__pycache__/__init__.cpython-37.pyc
- __MACOSX/p2c/utils/cider/pyciderevalcap/__pycache__/.___init__.cpython-37.pyc
- p2c/utils/cider/pyciderevalcap/ciderD/ciderD.py
- __MACOSX/p2c/utils/cider/pyciderevalcap/ciderD/._ciderD.py
- p2c/utils/cider/pyciderevalcap/ciderD/__init__.py
- __MACOSX/p2c/utils/cider/pyciderevalcap/ciderD/.___init__.py
- p2c/utils/cider/pyciderevalcap/ciderD/ciderD_scorer.py
- __MACOSX/p2c/utils/cider/pyciderevalcap/ciderD/._ciderD_scorer.py
- p2c/utils/cider/pyciderevalcap/ciderD/__pycache__/
- __MACOSX/p2c/utils/cider/pyciderevalcap/ciderD/.___pycache__
- p2c/utils/cider/pyciderevalcap/ciderD/__pycache__/__init__.cpython-38.pyc
- __MACOSX/p2c/utils/cider/pyciderevalcap/ciderD/__pycache__/.___init__.cpython-38.pyc
- p2c/utils/cider/pyciderevalcap/ciderD/__pycache__/ciderD.cpython-37.pyc
- __MACOSX/p2c/utils/cider/pyciderevalcap/ciderD/__pycache__/._ciderD.cpython-37.pyc
- p2c/utils/cider/pyciderevalcap/ciderD/__pycache__/ciderD_scorer.cpython-38.pyc
- __MACOSX/p2c/utils/cider/pyciderevalcap/ciderD/__pycache__/._ciderD_scorer.cpython-38.pyc
- p2c/utils/cider/pyciderevalcap/ciderD/__pycache__/ciderD_scorer.cpython-37.pyc
- __MACOSX/p2c/utils/cider/pyciderevalcap/ciderD/__pycache__/._ciderD_scorer.cpython-37.pyc
- p2c/utils/cider/pyciderevalcap/ciderD/__pycache__/ciderD.cpython-38.pyc
- __MACOSX/p2c/utils/cider/pyciderevalcap/ciderD/__pycache__/._ciderD.cpython-38.pyc
- p2c/utils/cider/pyciderevalcap/ciderD/__pycache__/__init__.cpython-37.pyc
- __MACOSX/p2c/utils/cider/pyciderevalcap/ciderD/__pycache__/.___init__.cpython-37.pyc
