# Supplementary material
Source: ML conference proceedings conference paper supplement (https://proceedings.neurips.cc/paper_files/paper/2022/hash/2a8e6c09a1fd747e43a74710c79efdd5-Abstract.html)
Supplement: Supplementary file 1 [file 2a8e6c09a1fd747e43a74710c79efdd5-Supplemental-Conference.zip › p2c/__init__.py]

__version__ = "0.1.0"
