# Supplementary material
Source: ML conference proceedings conference paper supplement (https://proceedings.neurips.cc/paper_files/paper/2022/hash/2a8e6c09a1fd747e43a74710c79efdd5-Abstract.html)
Supplement: Supplementary file 1 [file 2a8e6c09a1fd747e43a74710c79efdd5-Supplemental-Conference.zip › p2c/data/oi.yaml]

corpus: oi
corpus_file: oi.tsv
image_label_path:
  oi: YOUR_PATH_TO_DETECTION_TAGS_DIR
image_feature_path:
  oi: model_0060000
