# Supplementary material
Source: ML conference proceedings conference paper supplement (https://proceedings.neurips.cc/paper_files/paper/2022/hash/2a8e6c09a1fd747e43a74710c79efdd5-Abstract.html)
Supplement: Supplementary file 1 [file 2a8e6c09a1fd747e43a74710c79efdd5-Supplemental-Conference.zip › p2c/data/train.yaml]

img: train.img.tsv
hw: train.hw.tsv
label: train.label.tsv
feature: train.feature.tsv
caption: train_caption.json
