# Supplementary material
Source: ML conference proceedings conference paper supplement (https://proceedings.neurips.cc/paper_files/paper/2022/hash/2a8e6c09a1fd747e43a74710c79efdd5-Abstract.html)
Supplement: Supplementary file 1 [file 2a8e6c09a1fd747e43a74710c79efdd5-Supplemental-Conference.zip › p2c/data/val.yaml]

cbs_box: val.cbsbox.tsv
cbs_constraint: constraint_to_tokens.tsv
cbs_hierarchy: class_hierarchy.json
cbs_tokenforms: constraint_tokenforms.tsv
feature: val.feature.tsv
label: val.label.tsv
