# Supplementary material
Source: ML conference proceedings conference paper supplement (https://proceedings.neurips.cc/paper_files/paper/2022/hash/2a8e6c09a1fd747e43a74710c79efdd5-Abstract.html)
Supplement: Supplementary file 1 [file 2a8e6c09a1fd747e43a74710c79efdd5-Supplemental-Conference.zip › p2c/modeling/modeling_bert.py]

# Copyright (c) 2020 Microsoft Corporation. Licensed under the MIT license.
 
from __future__ import absolute_import, division, print_function, unicode_literals
import logging
import math
import torch
from torch import nn
import torch.nn.functional as F
from torch.nn import CrossEntropyLoss, MSELoss
from transformers.pytorch_transformers.modeling_bert import (BertEmbeddings, 
        BertSelfAttention, BertAttention, BertEncoder, BertLayer, 
        BertSelfOutput, BertIntermediate, BertOutput,
        BertPooler, BertLayerNorm, BertPreTrainedModel,
		BertPredictionHeadTransform, BertOnlyMLMHead, BertLMPredictionHead,
        BertConfig, BERT_PRETRAINED_MODEL_ARCHIVE_MAP,
        load_tf_weights_in_bert)
from .modeling_utils import CaptionPreTrainedModel, ImgPreTrainedModel
from ..utils.cbs import ConstrainedBeamSearch, select_best_beam_with_constraints

logger = logging.getLogger(__name__)


class CaptionBertSelfAttention(BertSelfAttention):
    """
    Modified from BertSelfAttention to add support for output_hidden_states.
    """
    def __init__(self, config):
        super(CaptionBertSelfAttention, self).__init__(config)

    def forward(self, hidden_states, attention_mask, head_mask=None,
            history_state=None):
        if history_state is not None:
            x_states = torch.cat([history_state, hidden_states], dim=1)
            mixed_query_layer = self.query(hidden_states)
            mixed_key_layer = self.key(x_states)
            mixed_value_layer = self.value(x_states)
        else:
            mixed_query_layer = self.query(hidden_states)
            mixed_key_layer = self.key(hidden_states)
            mixed_value_layer = self.value(hidden_states)

        query_layer = self.transpose_for_scores(mixed_query_layer)
        key_layer = self.transpose_for_scores(mixed_key_layer)
        value_layer = self.transpose_for_scores(mixed_value_layer)

        # Take the dot product between "query" and "key" to get the raw attention scores.
        attention_scores = torch.matmul(query_layer, key_layer.transpose(-1, -2))
        attention_scores = attention_scores / math.sqrt(self.attention_head_size)
        # Apply the attention mask is (precomputed for all layers in BertModel forward() function)
        attention_scores = attention_scores + attention_mask

        # Normalize the attention scores to probabilities.
        attention_probs = nn.Softmax(dim=-1)(attention_scores)

        # This is actually dropping out entire tokens to attend to, which might
        # seem a bit unusual, but is taken from the original Transformer paper.
        attention_probs = self.dropout(attention_probs)

        # Mask heads if we want to
        if head_mask is not None:
            attention_probs = attention_probs * head_mask

        context_layer = torch.matmul(attention_probs, value_layer)

        context_layer = context_layer.permute(0, 2, 1, 3).contiguous()
        new_context_layer_shape = context_layer.size()[:-2] + (self.all_head_size,)
        context_layer = context_layer.view(*new_context_layer_shape)

        outputs = (context_layer, attention_probs) if self.output_attentions else (context_layer,)
        return outputs


class CaptionBertAttention(BertAttention):
    """
    Modified from BertAttention to add support for output_hidden_states.
    """
    def __init__(self, config):
        super(CaptionBertAttention, self).__init__(config)
        self.self = CaptionBertSelfAttention(config)
        self.output = BertSelfOutput(config)

    def forward(self, input_tensor, attention_mask, head_mask=None,
            history_state=None):
        self_outputs = self.self(input_tensor, attention_mask, head_mask, history_state)
        attention_output = self.output(self_outputs[0], input_tensor)
        outputs = (attention_output,) + self_outputs[1:]  # add attentions if we output them
        return outputs


class CaptionBertEncoder(BertEncoder):
    """
    Modified from BertEncoder to add support for output_hidden_states.
    """
    def __init__(self, config):
        super(CaptionBertEncoder, self).__init__(config)
        self.output_attentions = config.output_attentions
        self.output_hidden_states = config.output_hidden_states
        self.layer = nn.ModuleList([CaptionBertLayer(config) for _ in range(config.num_hidden_layers)])

    def forward(self, hidden_states, attention_mask, head_mask=None,
                encoder_history_states=None):
        all_hidden_states = ()
        all_attentions = ()
        for i, layer_module in enumerate(self.layer):
            if self.output_hidden_states:
                all_hidden_states = all_hidden_states + (hidden_states,)

            history_state = None if encoder_history_states is None else encoder_history_states[i]
            layer_outputs = layer_module(
                    hidden_states, attention_mask, head_mask[i],
                    history_state)
            hidden_states = layer_outputs[0]

            if self.output_attentions:
                all_attentions = all_attentions + (layer_outputs[1],)

        # Add last layer
        if self.output_hidden_states:
            all_hidden_states = all_hidden_states + (hidden_states,)

        outputs = (hidden_states,)
        if self.output_hidden_states:
            outputs = outputs + (all_hidden_states,)
        if self.output_attentions:
            outputs = outputs + (all_attentions,)
        return outputs  # outputs, (hidden states), (attentions)


class CaptionBertLayer(BertLayer):
    """
    Modified from BertLayer to add support for output_hidden_states.
    """
    def __init__(self, config):
        super(CaptionBertLayer, self).__init__(config)
        self.attention = CaptionBertAttention(config)
        self.intermediate = BertIntermediate(config)
        self.output = BertOutput(config)

    def forward(self, hidden_states, attention_mask, head_mask=None,
                history_state=None):
        attention_outputs = self.attention(hidden_states, attention_mask,
                head_mask, history_state)
        attention_output = attention_outputs[0]
        intermediate_output = self.intermediate(attention_output)
        layer_output = self.output(intermediate_output, attention_output)
        outputs = (layer_output,) + attention_outputs[1:]  # add attentions if we output them
        return outputs


class BertImgModel(BertPreTrainedModel):
    """ Expand from BertModel to handle image region features as input
    """
    def __init__(self, config):
        super(BertImgModel, self).__init__(config)
        self.embeddings = BertEmbeddings(config)
        self.encoder = CaptionBertEncoder(config)
        self.pooler = BertPooler(config)

        self.img_dim = config.img_feature_dim
        logger.info('BertImgModel Image Dimension: {}'.format(self.img_dim))
        self.img_feature_type = config.img_feature_type
        if hasattr(config, 'use_img_layernorm'):
            self.use_img_layernorm = config.use_img_layernorm
        else:
            self.use_img_layernorm = None

        if config.img_feature_type == 'dis_code':
            self.code_embeddings = nn.Embedding(config.code_voc, config.code_dim, padding_idx=0)
            self.img_embedding = nn.Linear(config.code_dim, self.config.hidden_size, bias=True)
        elif config.img_feature_type == 'dis_code_t': # transpose
            self.code_embeddings = nn.Embedding(config.code_voc, config.code_dim, padding_idx=0)
            self.img_embedding = nn.Linear(config.code_size, self.config.hidden_size, bias=True)
        elif config.img_feature_type == 'dis_code_scale': # scaled
            self.input_embeddings = nn.Linear(config.code_dim, config.code_size, bias=True)
            self.code_embeddings = nn.Embedding(config.code_voc, config.code_dim, padding_idx=0)
            self.img_embedding = nn.Linear(config.code_dim, self.config.hidden_size, bias=True)
        else:
            self.img_embedding = nn.Linear(self.img_dim, self.config.hidden_size, bias=True)
            self.dropout = nn.Dropout(config.hidden_dropout_prob)
            if self.use_img_layernorm:
                self.LayerNorm = BertLayerNorm(config.hidden_size, eps=config.img_layer_norm_eps)

        self.apply(self.init_weights)

    def _resize_token_embeddings(self, new_num_tokens):
        old_embeddings = self.embeddings.word_embeddings
        new_embeddings = self._get_resized_embeddings(old_embeddings, new_num_tokens)
        self.embeddings.word_embeddings = new_embeddings
        return self.embeddings.word_embeddings

    def _prune_heads(self, heads_to_prune):
        """ Prunes heads of the model.
            heads_to_prune: dict of {layer_num: list of heads to prune in this layer}
            See base class PreTrainedModel
        """
        for layer, heads in heads_to_prune.items():
            self.encoder.layer[layer].attention.prune_heads(heads)

    def forward(self, input_ids, token_type_ids=None, attention_mask=None,
            position_ids=None, head_mask=None, img_feats=None,
            encoder_history_states=None):
        if attention_mask is None:
            attention_mask = torch.ones_like(input_ids)

        if token_type_ids is None:
            token_type_ids = torch.zeros_like(input_ids)

        # We create a 3D attention mask from a 2D tensor mask.
        # Sizes are [batch_size, 1, 1, to_seq_length]
        # So we can broadcast to [batch_size, num_heads, from_seq_length, to_seq_length]
        # this attention mask is more simple than the triangular masking of causal attention
        # used in OpenAI GPT, we just need to prepare the broadcast dimension here.
        if attention_mask.dim() == 2:
            extended_attention_mask = attention_mask.unsqueeze(1).unsqueeze(2)
        elif attention_mask.dim() == 3:
            extended_attention_mask = attention_mask.unsqueeze(1)
        else:
            raise NotImplementedError

        # Since attention_mask is 1.0 for positions we want to attend and 0.0 for
        # masked positions, this operation will create a tensor which is 0.0 for
        # positions we want to attend and -10000.0 for masked positions.
        # Since we are adding it to the raw scores before the softmax, this is
        # effectively the same as removing these entirely.
        extended_attention_mask = extended_attention_mask.to(dtype=next(self.parameters()).dtype) # fp16 compatibility
        extended_attention_mask = (1.0 - extended_attention_mask) * -10000.0

        # Prepare head mask if needed
        # 1.0 in head_mask indicate we keep the head
        # attention_probs has shape bsz x n_heads x N x N
        # input head_mask has shape [num_heads] or [num_hidden_layers x num_heads]
        # and head_mask is converted to shape [num_hidden_layers x batch x num_heads x seq_length x seq_length]
        if head_mask is not None:
            if head_mask.dim() == 1:
                head_mask = head_mask.unsqueeze(0).unsqueeze(0).unsqueeze(-1).unsqueeze(-1)
                head_mask = head_mask.expand(self.config.num_hidden_layers, -1, -1, -1, -1)
            elif head_mask.dim() == 2:
                head_mask = head_mask.unsqueeze(1).unsqueeze(-1).unsqueeze(-1)  # We can specify head_mask for each layer
            # switch to float if needed + fp16 compatibility
            head_mask = head_mask.to(dtype=next(self.parameters()).dtype) # switch to fload if need + fp16 compatibility
        else:
            head_mask = [None] * self.config.num_hidden_layers

        embedding_output = self.embeddings(input_ids, position_ids=position_ids,
                token_type_ids=token_type_ids)
        if encoder_history_states:
            assert img_feats is None, "Cannot take image features while using encoder history states"

        if img_feats is not None:
            if self.img_feature_type == 'dis_code':
                code_emb = self.code_embeddings(img_feats)
                img_embedding_output = self.img_embedding(code_emb)
            elif self.img_feature_type == 'dis_code_t': # transpose
                code_emb = self.code_embeddings(img_feats)
                code_emb = code_emb.permute(0, 2, 1)
                img_embedding_output = self.img_embedding(code_emb)
            elif self.img_feature_type == 'dis_code_scale': # left scaled
                code_emb = self.code_embeddings(img_feats)
                img_embedding_output = self.img_embedding(code_emb)
            else:
                img_embedding_output = self.img_embedding(img_feats)
                if self.use_img_layernorm:
                    img_embedding_output = self.LayerNorm(img_embedding_output)

                # add dropout on image embedding
                img_embedding_output = self.dropout(img_embedding_output)

            # concatenate two embeddings
            embedding_output = torch.cat((embedding_output, img_embedding_output), 1)

        encoder_outputs = self.encoder(embedding_output,
                extended_attention_mask, head_mask=head_mask,
                encoder_history_states=encoder_history_states)
        sequence_output = encoder_outputs[0]
        pooled_output = self.pooler(sequence_output)

        # add hidden_states and attentions if they are here
        outputs = (sequence_output, pooled_output,) + encoder_outputs[1:]
        return outputs


def instance_bce_with_logits(logits, labels, reduction='mean'):
    assert logits.dim() == 2
    loss = F.binary_cross_entropy_with_logits(logits, labels, reduction=reduction)
    if reduction == 'mean':
        loss *= labels.size(1)
    return loss


class ImageBertForSequenceClassification(BertPreTrainedModel):
    """
    Modified from BertForSequenceClassification to support oscar training.
    """
    def __init__(self, config):
        super(ImageBertForSequenceClassification, self).__init__(config)
        self.num_labels = config.num_labels
        self.loss_type = config.loss_type
        self.config = config
        if config.img_feature_dim > 0:
            self.bert = BertImgModel(config)
        else:
            self.bert = BertModel(config)
        self.dropout = nn.Dropout(config.hidden_dropout_prob)

        if hasattr(config, 'classifier'):
            if not hasattr(config, 'cls_hidden_scale'): 
                config.cls_hidden_scale = 2

            if config.classifier == 'linear':
                self.classifier = nn.Linear(config.hidden_size,
                                            self.config.num_labels)
            elif config.classifier == 'mlp':
                self.classifier = nn.Sequential(
                    nn.Linear(config.hidden_size, config.hidden_size * config.cls_hidden_scale),
                    nn.ReLU(),
                    nn.Linear(config.hidden_size * config.cls_hidden_scale, self.config.num_labels)
                )
        else:
            self.classifier = nn.Linear(config.hidden_size, self.config.num_labels)  # original
        self.apply(self.init_weights)

    def tie_linear_embeddings(self):
        self.bert.embeddings.word_embeddings_linear.weight = nn.Parameter(self.bert.embeddings.word_embeddings.weight.T.clone())
        self.bert.embeddings.word_embeddings_linear.weight.requires_grad = self.bert.embeddings.word_embeddings.weight.requires_grad

    def init_code_embedding(self, em):
        self.bert.code_embeddings.weight.data = em.clone()

    def forward(self, input_ids, token_type_ids=None, attention_mask=None, labels=None, 
            position_ids=None, head_mask=None, img_feats=None):
        outputs = self.bert(input_ids, position_ids=position_ids, token_type_ids=token_type_ids,
                            attention_mask=attention_mask, head_mask=head_mask, img_feats=img_feats)
        pooled_output = outputs[1]

        pooled_output = self.dropout(pooled_output)
        logits = self.classifier(pooled_output)

        outputs = (logits,) + outputs[2:]  # add hidden states and attention if they are here
        if labels is not None:
            if self.num_labels == 1: #  doing regression
                loss_fct = MSELoss()
                labels = labels.to(torch.float)
                loss = loss_fct(logits.view(-1), labels.view(-1))
            else:
                if self.loss_type == 'kl':
                    # KL Loss: https://github.com/uclanlp/visualbert/blob/master/pytorch_pretrained_bert/modeling.py
                    loss_fct = torch.nn.KLDivLoss(reduction="batchmean")
                    log_softmax = torch.nn.LogSoftmax(dim=-1)
                    reshaped_logits = logits.contiguous().view(-1, 3129)
                    reshaped_logits = log_softmax(reshaped_logits)
                    loss = loss_fct(reshaped_logits, labels.contiguous())
                elif self.loss_type == 'bce': # [VQA]
                    loss = instance_bce_with_logits(logits, labels)
                else: # cross_entropy [GQA, Retrieval, Captioning]
                    loss_fct = CrossEntropyLoss(reduction='none')
                    loss = loss_fct(logits.view(-1, self.num_labels), labels.view(-1))
            outputs = (loss,) + outputs
        return outputs


class ImageBertForMultipleChoice(BertPreTrainedModel):
    """
    Modified from BertForMultipleChoice to support oscar training.
    """
    def __init__(self, config):
        super(ImageBertForMultipleChoice, self).__init__(config)
        self.loss_type = config.loss_type
        if config.img_feature_dim > 0:
            self.bert = BertImgModel(config) # ImageBERT
        else:
            self.bert = BertModel(config)  # original BERT

        if hasattr(config, 'use_img_layernorm'):
            self.use_img_layernorm = config.use_img_layernorm
        else:
            self.use_img_layernorm = None

        self.dropout = nn.Dropout(config.hidden_dropout_prob)
        if hasattr(config, 'classifier'):
            if not hasattr(config, 'cls_hidden_scale'): config.cls_hidden_scale = 2
            if config.classifier == 'linear':
                self.classifier = nn.Linear(config.num_choice*config.hidden_size, self.config.num_labels)
            elif config.classifier == 'mlp':
                if self.use_img_layernorm:
                    self.classifier = nn.Sequential(
                    nn.Linear(config.num_choice*config.hidden_size, config.hidden_size*config.cls_hidden_scale),
                    nn.ReLU(),
                    BertLayerNorm(config.hidden_size*config.cls_hidden_scale, eps=config.layer_norm_eps),
                    nn.Linear(config.hidden_size*config.cls_hidden_scale, self.config.num_labels)
                )
                else:
                    self.classifier = nn.Sequential(
                        nn.Linear(config.num_choice*config.hidden_size, config.hidden_size*config.cls_hidden_scale),
                        nn.ReLU(),
                        nn.Linear(config.hidden_size*config.cls_hidden_scale, self.config.num_labels)
                    )
        else:
            self.classifier = nn.Linear(config.num_choice*config.hidden_size, self.config.num_labels)  # original

        self.apply(self.init_weights)

    def forward(self, input_ids, token_type_ids=None, attention_mask=None, labels=None,
                position_ids=None, head_mask=None, img_feats=None):
        num_choices = input_ids.shape[1]

        flat_input_ids = input_ids.view(-1, input_ids.size(-1))
        flat_position_ids = position_ids.view(-1, position_ids.size(-1)) if position_ids is not None else None
        flat_token_type_ids = token_type_ids.view(-1, token_type_ids.size(-1)) if token_type_ids is not None else None
        flat_attention_mask = attention_mask.view(-1, attention_mask.size(-1)) if attention_mask is not None else None

        flat_img_feats = img_feats.view(-1, img_feats.size(-2), img_feats.size(-1)) if img_feats is not None else None

        if isinstance(self.bert, BertImgModel):
            outputs = self.bert(flat_input_ids, position_ids=flat_position_ids, token_type_ids=flat_token_type_ids,
                            attention_mask=flat_attention_mask, head_mask=head_mask, img_feats=flat_img_feats)
        else:
            outputs = self.bert(flat_input_ids, position_ids=flat_position_ids, token_type_ids=flat_token_type_ids,
                                attention_mask=flat_attention_mask, head_mask=head_mask)
        pooled_output = outputs[1]

        pooled_output = self.dropout(pooled_output)

        # reshaped_pool_output
        reshaped_pool_output = pooled_output.view(-1, self.config.num_choice*(pooled_output.shape[1]))
        logits = self.classifier(reshaped_pool_output)

        outputs = (logits,) + outputs[2:]  # add hidden states and attention if they are here

        if labels is not None:
            if self.loss_type == 'bce':
                loss = instance_bce_with_logits(logits, labels.view(-1, self.config.num_labels))
            else:
                loss_fct = CrossEntropyLoss()
                loss = loss_fct(logits, labels)
            outputs = (loss,) + outputs
        return outputs

""" Oscar for Multiple Choice """
class OscarForMultipleChoice(BertPreTrainedModel):
    r"""
    Inputs:
        **input_ids**: ``torch.LongTensor`` of shape ``(batch_size, num_choices, sequence_length)``:
            Indices of input sequence tokens in the vocabulary.
            The second dimension of the input (`num_choices`) indicates the number of choices to score.
            To match pre-training, BERT input sequence should be formatted with [CLS] and [SEP] tokens as follows:

            (a) For sequence pairs:

                ``tokens:         [CLS] is this jack ##son ##ville ? [SEP] no it is not . [SEP]``

                ``token_type_ids:   0   0  0    0    0     0       0   0   1  1  1  1   1   1``

            (b) For single sequences:

                ``tokens:         [CLS] the dog is hairy . [SEP]``

                ``token_type_ids:   0   0   0   0  0     0   0``

            Indices can be obtained using :class:`pytorch_transformers.BertTokenizer`.
            See :func:`pytorch_transformers.PreTrainedTokenizer.encode` and
            :func:`pytorch_transformers.PreTrainedTokenizer.convert_tokens_to_ids` for details.
        **token_type_ids**: (`optional`) ``torch.LongTensor`` of shape ``(batch_size, num_choices, sequence_length)``:
            Segment token indices to indicate first and second portions of the inputs.
            The second dimension of the input (`num_choices`) indicates the number of choices to score.
            Indices are selected in ``[0, 1]``: ``0`` corresponds to a `sentence A` token, ``1``
            corresponds to a `sentence B` token
            (see `BERT: Pre-training of Deep Bidirectional Transformers for Language Understanding`_ for more details).
        **attention_mask**: (`optional`) ``torch.FloatTensor`` of shape ``(batch_size, num_choices, sequence_length)``:
            Mask to avoid performing attention on padding token indices.
            The second dimension of the input (`num_choices`) indicates the number of choices to score.
            Mask values selected in ``[0, 1]``:
            ``1`` for tokens that are NOT MASKED, ``0`` for MASKED tokens.
        **head_mask**: (`optional`) ``torch.FloatTensor`` of shape ``(num_heads,)`` or ``(num_layers, num_heads)``:
            Mask to nullify selected heads of the self-attention modules.
            Mask values selected in ``[0, 1]``:
            ``1`` indicates the head is **not masked**, ``0`` indicates the head is **masked**.
        **labels**: (`optional`) ``torch.LongTensor`` of shape ``(batch_size,)``:
            Labels for computing the multiple choice classification loss.
            Indices should be in ``[0, ..., num_choices]`` where `num_choices` is the size of the second dimension
            of the input tensors. (see `input_ids` above)

    Outputs: `Tuple` comprising various elements depending on the configuration (config) and inputs:
        **loss**: (`optional`, returned when ``labels`` is provided) ``torch.FloatTensor`` of shape ``(1,)``:
            Classification loss.
        **classification_scores**: ``torch.FloatTensor`` of shape ``(batch_size, num_choices)`` where `num_choices` is the size of the second dimension
            of the input tensors. (see `input_ids` above).
            Classification scores (before SoftMax).
        **hidden_states**: (`optional`, returned when ``config.output_hidden_states=True``)
            list of ``torch.FloatTensor`` (one for the output of each layer + the output of the embeddings)
            of shape ``(batch_size, sequence_length, hidden_size)``:
            Hidden-states of the model at the output of each layer plus the initial embedding outputs.
        **attentions**: (`optional`, returned when ``config.output_attentions=True``)
            list of ``torch.FloatTensor`` (one for each layer) of shape ``(batch_size, num_heads, sequence_length, sequence_length)``:
            Attentions weights after the attention softmax, used to compute the weighted average in the self-attention heads.

    Examples::

        >>> config = BertConfig.from_pretrained('bert-base-uncased')
        >>> tokenizer = BertTokenizer.from_pretrained('bert-base-uncased')
        >>>
        >>> model = BertForMultipleChoice(config)
        >>> choices = ["Hello, my dog is cute", "Hello, my cat is amazing"]
        >>> input_ids = torch.tensor([tokenizer.encode(s) for s in choices]).unsqueeze(0)  # Batch size 1, 2 choices
        >>> labels = torch.tensor(1).unsqueeze(0)  # Batch size 1
        >>> outputs = model(input_ids, labels=labels)
        >>> loss, classification_scores = outputs[:2]

    """

    def __init__(self, config):
        super(OscarForMultipleChoice, self).__init__(config)
        self.loss_type = config.loss_type

        if config.img_feature_dim > 0:
            self.bert = BertImgModel(config) # ImageBERT
        else:
            self.bert = BertModel(config)  # original BERT

        self.dropout = nn.Dropout(config.hidden_dropout_prob)

        if hasattr(config, 'classifier'):
            if not hasattr(config, 'cls_hidden_scale'): config.cls_hidden_scale = 2

            if config.classifier == 'linear':
                self.classifier = nn.Linear(config.hidden_size, 2) # original
                #self.classifier = weight_norm(nn.Linear(config.hidden_size, self.config.num_labels), dim=None)
            elif config.classifier == 'mlp':
                self.classifier = nn.Sequential(nn.Linear(config.hidden_size, config.hidden_size*config.cls_hidden_scale),
                                            nn.ReLU(),
                                            nn.Linear(config.hidden_size*config.cls_hidden_scale, 2)) # bce loss
        else:
            self.classifier = nn.Linear(config.hidden_size, config.num_labels)  # original

        self.apply(self.init_weights)

    def forward(self, input_ids, token_type_ids=None, attention_mask=None, labels=None,
                position_ids=None, head_mask=None, img_feats=None):
        num_choices = input_ids.shape[1]

        flat_input_ids = input_ids.view(-1, input_ids.size(-1))
        flat_position_ids = position_ids.view(-1, position_ids.size(-1)) if position_ids is not None else None
        flat_token_type_ids = token_type_ids.view(-1, token_type_ids.size(-1)) if token_type_ids is not None else None
        flat_attention_mask = attention_mask.view(-1, attention_mask.size(-1)) if attention_mask is not None else None

        flat_img_feats = img_feats.view(-1, img_feats.size(-2), img_feats.size(-1)) if img_feats is not None else None

        if isinstance(self.bert, BertImgModel):
            outputs = self.bert(flat_input_ids, position_ids=flat_position_ids, token_type_ids=flat_token_type_ids,
                            attention_mask=flat_attention_mask, head_mask=head_mask, img_feats=flat_img_feats)
        else:
            outputs = self.bert(flat_input_ids, position_ids=flat_position_ids, token_type_ids=flat_token_type_ids,
                                attention_mask=flat_attention_mask, head_mask=head_mask)

        pooled_output = outputs[1]
        pooled_output = self.dropout(pooled_output)
        logits = self.classifier(pooled_output)

        outputs = (logits,) + outputs[2:]  # add hidden states and attention if they are here

        #logger.info('pooled_output: {}, reshaped_pool_output: {}, logits: {}'.format(pooled_output.shape, reshaped_pool_output.shape, logits.shape))
        #logger.info('logits: {}, reshaped_logits: {}'.format(logits.shape, reshaped_logits.shape))
        #logger.info('labels: {}, labels.veiw: {}, labels.view(-1, num_labels): {}'.format(labels.shape, labels.view(-1).shape, labels.view(-1, self.config.num_labels).shape))
        if labels is not None:
            if self.loss_type == 'bce': #[batch_size, 2] v1
                #loss = instance_bce_with_logits(reshaped_logits, labels)
                loss = instance_bce_with_logits(logits, labels.view(-1, self.config.num_labels))
            elif self.loss_type == 'bxe':
                loss_fct = CrossEntropyLoss()
                loss = loss_fct(logits, labels.view(-1))
            else:
                loss_fct = CrossEntropyLoss()
                #loss = loss_fct(reshaped_logits, labels)
                loss = loss_fct(logits, labels)
            outputs = (loss,) + outputs

        return outputs  # (loss), reshaped_logits, (hidden_states), (attentions)


class BertCaptioningLoss(nn.Module):
    def __init__(self, config):
        super().__init__()
        self.label_smoothing = getattr(config, 'label_smoothing', 0)
        self.drop_worst_ratio = getattr(config, 'drop_worst_ratio', 0)
        self.drop_worst_after = getattr(config, 'drop_worst_after', 0)
        self.log_soft = nn.LogSoftmax(dim=1)
        self.kl = nn.KLDivLoss(reduction='none')
        self.iter = 0

    def forward(self, logits, target):
        self.iter += 1
        eps = self.label_smoothing
        n_class = logits.size(1)
        one_hot = torch.zeros_like(logits).scatter(1, target.view(-1, 1), 1)
        one_hot = one_hot * (1 - eps) + (1 - one_hot) * eps / (n_class - 1)
        log_prb = self.log_soft(logits)
        loss = self.kl(log_prb, one_hot).sum(1)

        if self.drop_worst_ratio > 0 and self.iter > self.drop_worst_after:
            loss, _ = torch.topk(loss,
                    k=int(loss.shape[0] * (1-self.drop_worst_ratio)),
                    largest=False)

        loss = loss.mean()

        return loss


class BertForImageCaptioning(CaptionPreTrainedModel):
    """
    Bert for Image Captioning.
    """
    def __init__(self, config):
        super(BertForImageCaptioning, self).__init__(config)
        self.config = config
        self.bert = BertImgModel(config)
        self.cls = BertOnlyMLMHead(config)
        self.loss = BertCaptioningLoss(config)

        self.apply(self.init_weights)
        self.tie_weights()

    def tie_weights(self):
        if hasattr(self.config, 'tie_weights') and self.config.tie_weights:
            self._tie_or_clone_weights(self.cls.predictions.decoder,
                                       self.bert.embeddings.word_embeddings)
        freeze = False
        if hasattr(self.config, 'freeze_embedding'):
            freeze = self.config.freeze_embedding
        self.bert.embeddings.word_embeddings.weight.requires_grad = not freeze

    def forward(self, *args, **kwargs):
        is_decode = kwargs.get('is_decode', False)
        if is_decode:
            return self.generate(*args, **kwargs)
        else:
            return self.encode_forward(*args, **kwargs)

    def encode_forward(self, input_ids, img_feats, attention_mask, masked_pos, masked_ids=None, 
            token_type_ids=None, position_ids=None, head_mask=None,
            is_training=True, encoder_history_states=None):
        outputs = self.bert(input_ids, img_feats=img_feats, attention_mask=attention_mask, 
                position_ids=position_ids, token_type_ids=token_type_ids,
                head_mask=head_mask,
                encoder_history_states=encoder_history_states)
        sequence_output = outputs[0][:, :masked_pos.shape[-1], :]

        if is_training:
            sequence_output = outputs[0][:, :masked_pos.shape[-1], :]
            # num_masks_in_batch * hidden_size
            sequence_output_masked = sequence_output[masked_pos==1, :]
            class_logits = self.cls(sequence_output_masked)
            masked_ids = masked_ids[masked_ids != 0]   # remove padding masks
            masked_loss = self.loss(class_logits.float(), masked_ids)
            outputs = (masked_loss, class_logits,) + outputs[2:]
        else:
            sequence_output = outputs[0][:, :input_ids.shape[-1], :]
            class_logits = self.cls(sequence_output)
            outputs = (class_logits,) + outputs[2:]
        return outputs


    def prepare_inputs_for_generation(self, curr_ids, past=None):
        # NOTE: if attention is on, it should be the token used to mask words in training
        mask_token_id = self.mask_token_id
        batch_size = curr_ids.shape[0]
        mask_ids = torch.full(
            (batch_size, 1), mask_token_id, dtype=torch.long, device=curr_ids.device
        )

        def _slice(t, start, end):
            if t is None:
                return t
            assert t.shape == (batch_size, self.max_seq_len + self.od_labels_len)
            return t[:, start: end]

        def _remove_elements(t, start, end):
            if t is None:
                return t
            assert t.shape == (batch_size, self.max_seq_len + self.od_labels_len)
            return torch.cat([t[:, :start], t[:, end:]], dim=1)

        if past is None:
            input_ids = torch.cat([curr_ids, mask_ids], dim=1)

            curr_len = input_ids.shape[1]
            full_len = self.max_seq_len + self.od_labels_len + self.img_seq_len
            assert self.full_attention_mask.shape == (batch_size,
                    full_len, full_len)

            def _remove_rows_cols(t, row_start, row_end, col_start, col_end):
                t00 = t[:, :row_start, :col_start]
                t01 = t[:, :row_start, col_end:]
                t10 = t[:, row_end:, :col_start]
                t11 = t[:, row_end:, col_end:]
                res = torch.cat([torch.cat([t00, t01], dim=2), torch.cat([t10, t11],
                            dim=2)], dim=1)
                assert res.shape == (t.shape[0], t.shape[1]-row_end+row_start,
                        t.shape[2]-col_end+col_start)
                return res

            seq_start = curr_len
            seq_end = self.max_seq_len
            attention_mask = _remove_rows_cols(self.full_attention_mask, seq_start,
                    seq_end, seq_start, seq_end)

            masked_pos = _remove_elements(self.full_masked_pos, seq_start, seq_end)
            token_type_ids = _remove_elements(self.full_token_type_ids, seq_start, seq_end)
            position_ids = _remove_elements(self.full_position_ids, seq_start, seq_end)
            img_feats = self.img_feats

            if self.add_od_labels:
                assert self.od_label_ids.shape[1] == self.od_labels_len
                input_ids = torch.cat([input_ids, self.od_label_ids], dim=1)
        else:
            last_token = curr_ids[:, -1:]
            # The representation of last token should be re-computed, because
            # it depends on both self-attention context and input tensor
            input_ids = torch.cat([last_token, mask_ids], dim=1)
            start_pos = curr_ids.shape[1] - 1
            end_pos = start_pos + input_ids.shape[1]
            masked_pos = _slice(self.full_masked_pos, start_pos, end_pos)
            token_type_ids = _slice(self.full_token_type_ids, start_pos, end_pos)
            position_ids = _slice(self.full_position_ids, start_pos, end_pos)

            img_feats = None
            assert past[0].shape[0] == batch_size
            if self.prev_encoded_layers is None:
                assert start_pos == 1  # the first token after BOS
                assert past[0].shape[1] == 2 + self.od_labels_len + self.img_seq_len
                # reorder to [od_labels, img_feats, sentence]
                self.prev_encoded_layers = [
                        torch.cat([x[:, 2:, :], x[:, :start_pos,:]], dim=1)
                        for x in past]
                s2s = self.full_attention_mask[:, :self.max_seq_len,
                        :self.max_seq_len]
                s2i = self.full_attention_mask[:, :self.max_seq_len,
                        self.max_seq_len:]
                i2s = self.full_attention_mask[:, self.max_seq_len:,
                        :self.max_seq_len]
                i2i = self.full_attention_mask[:, self.max_seq_len:,
                        self.max_seq_len:]
                self.full_attention_mask = torch.cat(
                        [torch.cat([i2i, i2s], dim=2),
                        torch.cat([s2i, s2s], dim=2)],
                        dim=1)
            else:
                assert start_pos > 1
                assert past[0].shape[1] == 2
                self.prev_encoded_layers = [torch.cat([x, p[:, :-1, :]], dim=1)
                        for x, p in zip(self.prev_encoded_layers, past)]

            attention_mask = self.full_attention_mask[:,
                self.od_labels_len+self.img_seq_len+start_pos: self.od_labels_len+self.img_seq_len+end_pos,
                :self.od_labels_len+self.img_seq_len+end_pos]

        return {'input_ids': input_ids, 'img_feats': img_feats,
            'masked_pos': masked_pos, 'attention_mask': attention_mask,
            'token_type_ids': token_type_ids, 'position_ids': position_ids,
            'is_training': False,
            'encoder_history_states': self.prev_encoded_layers}

    def get_output_embeddings(self):
        return self.decoder

    def generate(self, img_feats, attention_mask, masked_pos, token_type_ids=None,
            position_ids=None, head_mask=None, input_ids=None, max_length=None,
            do_sample=None, num_beams=None, temperature=None, top_k=None, top_p=None,
            repetition_penalty=None, bos_token_id=None, pad_token_id=None,
            eos_token_ids=None, mask_token_id=None, length_penalty=None,
            num_return_sequences=None,
            num_keep_best=1, is_decode=None,
            add_od_labels=False, od_labels_start_posid=None,
            use_cbs=False, fsm=None, num_constraints=None,
            min_constraints_to_satisfy=None, use_hypo=False,
            decoding_constraint_flag=None, bad_ending_ids=None,
            ):
        """ Generates captions given image features
        """
        assert is_decode
        batch_size = img_feats.shape[0]
        self.img_seq_len = img_feats.shape[1]
        self.max_seq_len = max_length
        self.mask_token_id = mask_token_id
        self.prev_encoded_layers = None
        # NOTE: num_keep_best is not equavilant to num_return_sequences
        # num_keep_best is the number of hypotheses to keep in beam search
        # num_return_sequences is the repeating times of input, coupled with
        # do_sample=True can generate more than one samples per image
        self.num_keep_best = num_keep_best

        vocab_size = self.config.vocab_size
        if not use_cbs:
            num_fsm_states = 1
        else:
            b, num_fsm_states, f1, v = fsm.shape
            assert b==batch_size and v==vocab_size and f1==num_fsm_states

        self.add_od_labels = add_od_labels
        # avoid position_ids collision of caption and od labels
        self.od_labels_start_posid = max(od_labels_start_posid, self.max_seq_len)
        if self.add_od_labels:
            # get od labels part from input_ids
            assert input_ids.shape[0] == batch_size
            od_label_ids = input_ids[:, self.max_seq_len:]
            self.od_labels_len = input_ids.shape[1] - self.max_seq_len
            input_ids = None
        else:
            self.od_labels_len = 0
            od_label_ids = None
            assert input_ids.shape == (batch_size, self.max_seq_len)
            input_ids = None

        if input_ids is None:
            input_ids = torch.full(
                (batch_size, 1), bos_token_id, dtype=torch.long, device=img_feats.device
            )
        else:
            assert input_ids.dim() == 2, "Input prompt should be of shape (batch_size, sequence length)."
            assert input_ids.shape[0] == batch_size, "Input batch size must match image features"

        cur_len = input_ids.shape[1]
        if  num_return_sequences != 1:
            # Expand input to num return sequences
            input_ids = self._expand_for_beams(input_ids, num_return_sequences)
            effective_batch_size = batch_size * num_return_sequences
        else:
            effective_batch_size = batch_size

        if position_ids is None:
            position_ids = torch.arange(self.max_seq_len, dtype=torch.long, device=input_ids.device)
            posids_len = self.max_seq_len
            if self.add_od_labels:
                od_labels_posids = torch.arange(
                        self.od_labels_start_posid,
                        self.od_labels_start_posid + self.od_labels_len, dtype=torch.long, device=input_ids.device)
                position_ids = torch.cat([position_ids, od_labels_posids])
                posids_len += self.od_labels_len
            position_ids = position_ids.unsqueeze(0).expand([batch_size, posids_len])

        num_expand = num_beams * num_fsm_states * num_return_sequences
        self.od_label_ids = self._expand_for_beams(od_label_ids, num_expand)
        self.img_feats = self._expand_for_beams(img_feats, num_expand)
        self.full_attention_mask = self._expand_for_beams(attention_mask, num_expand)
        self.full_masked_pos = self._expand_for_beams(masked_pos, num_expand)
        self.full_token_type_ids = self._expand_for_beams(token_type_ids, num_expand)
        self.full_position_ids = self._expand_for_beams(position_ids, num_expand)
        self.full_head_mask = self._expand_for_beams(head_mask, num_expand)

        if not use_cbs:
            if num_beams > 1:
                output = self._generate_beam_search(
                    input_ids,
                    cur_len,
                    max_length,
                    do_sample,
                    temperature,
                    top_k,
                    top_p,
                    repetition_penalty,
                    pad_token_id,
                    eos_token_ids,
                    effective_batch_size,
                    length_penalty,
                    num_beams,
                    vocab_size,
                )
            else:
                output = self._generate_no_beam_search(
                    input_ids,
                    cur_len,
                    max_length,
                    do_sample,
                    temperature,
                    top_k,
                    top_p,
                    repetition_penalty,
                    pad_token_id,
                    eos_token_ids,
                    effective_batch_size,
                )
        else:
            assert self.num_keep_best == 1, 'not supported n_best > 1 for CBS'
            searcher = ConstrainedBeamSearch(eos_token_ids, max_length,
                    num_beams)
            curr_ids, sum_logprobs = searcher.search(
                    input_ids,
                    None,
                    self._decode_step,
                    fsm,
            )
            curr_ids, logprobs = select_best_beam_with_constraints(
                curr_ids,
                sum_logprobs,
                num_constraints,
                min_constraints_to_satisfy,
                eos_token_ids,
            )
            # (batch_size, n_best, max_len), (batch_size, n_best)
            output = (curr_ids.unsqueeze(1), logprobs.unsqueeze(1))

        return output

    def _expand_for_beams(self, x, num_expand):
        if x is None or num_expand == 1:
            return x

        input_shape = list(x.shape)
        expanded_shape = input_shape[:1] + [num_expand] + input_shape[1:]
        x = x.unsqueeze(1).expand(expanded_shape)
        # (batch_size * num_expand, ...)
        x = x.contiguous().view([input_shape[0] * num_expand] + input_shape[1:])
        return x

    def _do_output_past(self, outputs):
        return len(outputs) > 1


class BertPreTrainingHeads(nn.Module):
    def __init__(self, config):
        super(BertPreTrainingHeads, self).__init__()
        self.predictions = BertLMPredictionHead(config)
        num_seq_relations = config.num_contrast_classes if hasattr(config, "num_contrast_classes") else 2
        self.seq_relationship = nn.Linear(config.hidden_size, num_seq_relations)

    def forward(self, sequence_output, pooled_output):
        prediction_scores = self.predictions(sequence_output)
        seq_relationship_score = self.seq_relationship(pooled_output)
        return prediction_scores, seq_relationship_score


class BertImgForPreTraining(ImgPreTrainedModel):
    r"""
        **masked_lm_labels**: (`optional`) ``torch.LongTensor`` of shape ``(batch_size, sequence_length)``:
            Labels for computing the masked language modeling loss.
            Indices should be in ``[-1, 0, ..., config.vocab_size]`` (see ``input_ids`` docstring)
            Tokens with indices set to ``-1`` are ignored (masked), the loss is only computed for the tokens with labels
            in ``[0, ..., config.vocab_size]``
        **next_sentence_label**: (`optional`) ``torch.LongTensor`` of shape ``(batch_size,)``:
            Labels for computing the next sequence prediction (classification) loss. Input should be a sequence pair (see ``input_ids`` docstring)
            Indices should be in ``[0, 1]``.
            ``0`` indicates sequence B is a continuation of sequence A,
            ``1`` indicates sequence B is a random sequence.

    Outputs: `Tuple` comprising various elements depending on the configuration (config) and inputs:
        **loss**: (`optional`, returned when both ``masked_lm_labels`` and ``next_sentence_label`` are provided) ``torch.FloatTensor`` of shape ``(1,)``:
            Total loss as the sum of the masked language modeling loss and the next sequence prediction (classification) loss.
        **prediction_scores**: ``torch.FloatTensor`` of shape ``(batch_size, sequence_length, config.vocab_size)``
            Prediction scores of the language modeling head (scores for each vocabulary token before SoftMax).
        **seq_relationship_scores**: ``torch.FloatTensor`` of shape ``(batch_size, sequence_length, 2)``
            Prediction scores of the next sequence prediction (classification) head (scores of True/False continuation before SoftMax).
        **hidden_states**: (`optional`, returned when ``config.output_hidden_states=True``)
            list of ``torch.FloatTensor`` (one for the output of each layer + the output of the embeddings)
            of shape ``(batch_size, sequence_length, hidden_size)``:
            Hidden-states of the model at the output of each layer plus the initial embedding outputs.
        **attentions**: (`optional`, returned when ``config.output_attentions=True``)
            list of ``torch.FloatTensor`` (one for each layer) of shape ``(batch_size, num_heads, sequence_length, sequence_length)``:
            Attentions weights after the attention softmax, used to compute the weighted average in the self-attention heads.

    Examples::

        >>> config = BertConfig.from_pretrained('bert-base-uncased')
        >>> tokenizer = BertTokenizer.from_pretrained('bert-base-uncased')
        >>>
        >>> model = BertImgForPreTraining(config)
        >>> input_ids = torch.tensor(tokenizer.encode("Hello, my dog is cute")).unsqueeze(0)  # Batch size 1
        >>> outputs = model(input_ids)
        >>> prediction_scores, seq_relationship_scores = outputs[:2]

    """
    config_class = BertConfig
    pretrained_model_archive_map = BERT_PRETRAINED_MODEL_ARCHIVE_MAP
    load_tf_weights = load_tf_weights_in_bert
    base_model_prefix = "bert"

    def __init__(self, config):
        super(BertImgForPreTraining, self).__init__(config)

        #self.bert = BertModel(config) # original BERT
        self.bert = BertImgModel(config)
        self.cls = BertPreTrainingHeads(config)
        self.num_seq_relations = config.num_contrast_classes if hasattr(config, "num_contrast_classes") else 2

        self.apply(self.init_weights)
        self.tie_weights()

    def init_weights(self, module):
        """ Initialize the weights.
        """
        if isinstance(module, (nn.Linear, nn.Embedding)):
            # Slightly different from the TF version which uses truncated_normal for initialization
            # cf https://github.com/pytorch/pytorch/pull/5617
            module.weight.data.normal_(mean=0.0,
                                       std=self.config.initializer_range)
        elif isinstance(module, BertLayerNorm):
            module.bias.data.zero_()
            module.weight.data.fill_(1.0)
        if isinstance(module, nn.Linear) and module.bias is not None:
            module.bias.data.zero_()

    def tie_weights(self):
        """ Make sure we are sharing the input and output embeddings.
            Export to TorchScript can't handle parameter sharing so we are cloning them instead.
        """
        self._tie_or_clone_weights(self.cls.predictions.decoder,
                                   self.bert.embeddings.word_embeddings)

    def forward(self, input_ids, token_type_ids=None, attention_mask=None, masked_lm_labels=None,
            next_sentence_label=None, position_ids=None, head_mask=None, img_feats=None):
        outputs = self.bert(input_ids, position_ids=position_ids, token_type_ids=token_type_ids,
                            attention_mask=attention_mask, head_mask=head_mask, img_feats=img_feats)

        sequence_output, pooled_output = outputs[:2]
        prediction_scores, seq_relationship_score = self.cls(sequence_output, pooled_output)

        outputs = (prediction_scores, seq_relationship_score,) + outputs[2:]  # add hidden states and attention if they are here

        if masked_lm_labels is not None and next_sentence_label is not None:
            loss_fct = CrossEntropyLoss(ignore_index=-1)
            masked_lm_loss = loss_fct(prediction_scores.view(-1, self.config.vocab_size), masked_lm_labels.view(-1))
            next_sentence_loss = loss_fct(seq_relationship_score.view(-1, self.num_seq_relations), next_sentence_label.view(-1))
            total_loss = masked_lm_loss + next_sentence_loss
            outputs = (total_loss,) + outputs + (masked_lm_loss,)

        return outputs  # (loss), prediction_scores, seq_relationship_score, (hidden_states), (attentions)


class BertForTagPreTraining(ImgPreTrainedModel):
    config_class = BertConfig
    pretrained_model_archive_map = BERT_PRETRAINED_MODEL_ARCHIVE_MAP
    load_tf_weights = load_tf_weights_in_bert
    base_model_prefix = "bert"

    def __init__(self, config):
        super(BertForTagPreTraining, self).__init__(config)

        #self.bert = BertModel(config) # original BERT
        self.bert = BertImgModel(config)
        self.cls = BertPreTrainingHeads(config)
        self.num_seq_relations = config.num_contrast_classes if hasattr(config, "num_contrast_classes") else 2

        self.apply(self.init_weights)
        self.tie_weights()

    def init_weights(self, module):
        """ Initialize the weights.
        """
        if isinstance(module, (nn.Linear, nn.Embedding)):
            # Slightly different from the TF version which uses truncated_normal for initialization
            # cf https://github.com/pytorch/pytorch/pull/5617
            module.weight.data.normal_(mean=0.0,
                                       std=self.config.initializer_range)
        elif isinstance(module, BertLayerNorm):
            module.bias.data.zero_()
            module.weight.data.fill_(1.0)
        if isinstance(module, nn.Linear) and module.bias is not None:
            module.bias.data.zero_()

    def tie_weights(self):
        """ Make sure we are sharing the input and output embeddings.
            Export to TorchScript can't handle parameter sharing so we are cloning them instead.
        """
        self._tie_or_clone_weights(self.cls.predictions.decoder,
                                   self.bert.embeddings.word_embeddings)

    def train_forward(self, input_ids, token_type_ids=None, attention_mask=None, masked_lm_labels=None,
            next_sentence_label=None, position_ids=None, head_mask=None, img_feats=None):
        outputs = self.bert(input_ids, position_ids=position_ids, token_type_ids=token_type_ids,
                            attention_mask=attention_mask, head_mask=head_mask, img_feats=img_feats)

        sequence_output, pooled_output = outputs[:2]
        prediction_scores, seq_relationship_score = self.cls(sequence_output, pooled_output)

        outputs = (prediction_scores, ) + outputs[2:]  # add hidden states and attention if they are here

        if masked_lm_labels is not None:
            loss_fct = CrossEntropyLoss(ignore_index=-1)
            total_loss = loss_fct(prediction_scores.view(-1, self.config.vocab_size), masked_lm_labels.view(-1))
            outputs = (total_loss,) + outputs

        return outputs  # (loss), prediction_scores, seq_relationship_score, (hidden_states), (attentions)

    def forward(self, input_ids, img_feats, attention_mask, masked_pos, masked_ids=None, 
            token_type_ids=None, position_ids=None, head_mask=None,
            is_training=True, encoder_history_states=None):
        outputs = self.bert(input_ids, img_feats=img_feats, attention_mask=attention_mask, 
                position_ids=position_ids, token_type_ids=token_type_ids,
                head_mask=head_mask,
                encoder_history_states=encoder_history_states)
        sequence_output = outputs[0][:, :masked_pos.shape[-1], :]

        if is_training:
            sequence_output = outputs[0][:, :masked_pos.shape[-1], :]
            # num_masks_in_batch * hidden_size
            sequence_output_masked = sequence_output[masked_pos==1, :]
            class_logits = self.cls.predictions(sequence_output_masked)
            masked_ids = masked_ids[masked_ids != 0]   # remove padding masks
            loss_fct = CrossEntropyLoss(ignore_index=-1)
            masked_loss = loss_fct(class_logits.view(-1, self.config.vocab_size), masked_ids.view(-1))
            # masked_loss = self.loss(class_logits.float(), masked_ids)
            outputs = (masked_loss, class_logits,) + outputs[2:]
        else:
            sequence_output = outputs[0][:, :input_ids.shape[-1], :]
            class_logits = self.cls(sequence_output)
            outputs = (class_logits,) + outputs[2:]
        return outputs


def D(p, z, version='simplified'): # negative cosine similarity
    if version == 'original':
        z = z.detach() # stop gradient
        p = F.normalize(p, dim=1) # l2-normalize 
        z = F.normalize(z, dim=1) # l2-normalize 
        return -(p*z).sum(dim=1).mean()

    elif version == 'simplified':# same thing, much faster. Scroll down, speed test in __main__
        return - F.cosine_similarity(p, z.detach(), dim=-1).mean()
    else:
        raise Exception


class projection_MLP(nn.Module):
    def __init__(self, in_dim, hidden_dim=768, out_dim=768, num_layers=3):
        super().__init__()
        self.num_layers = num_layers
        self.layer1 = nn.Sequential(
            nn.Linear(in_dim, hidden_dim),
        )
        self.layer1_5 = nn.BatchNorm1d(hidden_dim)
        self.layer2 = nn.Sequential(
            nn.ReLU(inplace=True),
            nn.Linear(hidden_dim, hidden_dim),
        )
        self.layer2_5 = nn.BatchNorm1d(hidden_dim)
        self.layer3 = nn.Sequential(
            nn.ReLU(inplace=True),
            nn.Linear(hidden_dim, out_dim),
        )
        self.layer3_5 = nn.BatchNorm1d(hidden_dim)
        self.num_layers = 3

    def forward(self, x):
        x = self.layer1(x)
        x = x.unsqueeze(2)
        x = self.layer1_5(x)
        x = x.squeeze()
        x = self.layer2(x)
        x = x.unsqueeze(2)
        x = self.layer2_5(x)
        x = x.squeeze()
        if self.num_layers == 2:
            return x
        else:
            x = self.layer3(x)
            x = x.unsqueeze(2)
            x = self.layer3_5(x)
            x = x.squeeze()
            return x

class prediction_MLP(nn.Module):
    def __init__(self, in_dim=768, hidden_dim=256, out_dim=768): # bottleneck structure
        super().__init__()
        self.linear = nn.Linear(in_dim, hidden_dim)
        self.bn = nn.BatchNorm1d(hidden_dim)
        self.relu = nn.ReLU(inplace=True)
        self.layer2 = nn.Linear(hidden_dim, out_dim)
        """
        Adding BN to the output of the prediction MLP h does not work
        well (Table 3d). We find that this is not about collapsing. 
        The training is unstable and the loss oscillates.
        """

    def forward(self, x):
        x = self.linear(x)
        x = x.unsqueeze(2)
        x = self.bn(x)
        x = x.squeeze()
        x = self.relu(x)
        x = self.layer2(x)
        return x 

class SimSiam(BertPreTrainedModel):
    def __init__(self, config):
        super(SimSiam, self).__init__(config)
        
        self.config = config
        self.bert = BertImgModel(config)
        self.projector = projection_MLP(config.hidden_size)
        self.predictor = prediction_MLP()
    
    def forward(self, input_ids, attention_mask, input_ids2, attention_mask2, 
                      img_feats=None, token_type_ids=None, img_feats2=None, token_type_ids2=None, 
                      position_ids=None, head_mask=None, is_training=True, encoder_history_states=None,
                      position_ids2=None, head_mask2=None, encoder_history_states2=None
    ):
        outputs1 = self.bert(input_ids, img_feats=img_feats, attention_mask=attention_mask, 
                position_ids=position_ids, token_type_ids=token_type_ids,
                head_mask=head_mask, encoder_history_states=encoder_history_states)
        f1 = outputs1[1]
        z1 = self.projector(f1)
        p1 = self.predictor(z1)
        
        outputs2 = self.bert(input_ids2, img_feats=img_feats2, attention_mask=attention_mask2, 
                position_ids=position_ids2, token_type_ids=token_type_ids2,
                head_mask=head_mask2, encoder_history_states=encoder_history_states2)
        f2 = outputs2[1]
        z2 = self.projector(f2)
        p2 = self.predictor(z2)

        loss = self.compute_loss(p1, z1, p2, z2)
        acc = self.compute_acc(z1, z2)
        return loss, acc

    def compute_loss(self, p1, z1, p2, z2):
        return (self.loss(p1, z2) / 2 + self.loss(p2, z1) / 2)

    def loss(self, p, z):
        return - F.cosine_similarity(p, z.detach(), dim=-1).mean()

    def compute_acc(self, z1, z2):
        with torch.no_grad():
            z1 = F.normalize(z1, dim=1)
            z2 = F.normalize(z2, dim=1)
            similarity_matrix = F.cosine_similarity(z1.unsqueeze(1), z2.unsqueeze(0), dim=-1)
            labels = torch.arange(z1.size(0), dtype=torch.long).to(z1.device)
            pred = torch.argmax(similarity_matrix, dim=1)
            acc = torch.sum(pred == labels).item() / z1.size(0)
            return acc

def NT_XentLoss(z1, z2, temperature=0.5):
    z1 = F.normalize(z1, dim=1)
    z2 = F.normalize(z2, dim=1)
    N, Z = z1.shape 
    device = z1.device 
    representations = torch.cat([z1, z2], dim=0)
    similarity_matrix = F.cosine_similarity(representations.unsqueeze(1), representations.unsqueeze(0), dim=-1)
    l_pos = torch.diag(similarity_matrix, N)
    r_pos = torch.diag(similarity_matrix, -N)
    positives = torch.cat([l_pos, r_pos]).view(2 * N, 1)
    diag = torch.eye(2*N, dtype=torch.bool, device=device)
    diag[N:,:N] = diag[:N,N:] = diag[:N,:N]

    negatives = similarity_matrix[~diag].view(2*N, -1)

    logits = torch.cat([positives, negatives], dim=1)
    logits /= temperature

    labels = torch.zeros(2*N, device=device, dtype=torch.int64)

    loss = F.cross_entropy(logits, labels, reduction='sum')
    return loss / (2 * N)


class simclr_projection_MLP(nn.Module):
    def __init__(self, in_dim, out_dim=256):
        super().__init__()
        hidden_dim = in_dim
        self.layer1 = nn.Sequential(
            nn.Linear(in_dim, hidden_dim),
            nn.ReLU(inplace=True)
        )
        self.layer2 = nn.Linear(hidden_dim, out_dim)
    def forward(self, x):
        x = self.layer1(x)
        x = self.layer2(x)
        return x 

class SimCLR(BertPreTrainedModel):

    def __init__(self, config):
        super(SimCLR, self).__init__(config)
        
        self.bert = BertImgModel(config)
        self.projector1 = simclr_projection_MLP(config.hidden_size)
        self.projector2 = simclr_projection_MLP(config.hidden_size)

    def forward(self, input_ids, attention_mask, input_ids2, attention_mask2, 
                      img_feats=None, token_type_ids=None, img_feats2=None, token_type_ids2=None, 
                      position_ids=None, head_mask=None, is_training=True, encoder_history_states=None,
                      position_ids2=None, head_mask2=None, encoder_history_states2=None
    ):
        outputs1 = self.bert(input_ids, img_feats=img_feats, attention_mask=attention_mask, 
                position_ids=position_ids, token_type_ids=token_type_ids,
                head_mask=head_mask, encoder_history_states=encoder_history_states)
        f1 = outputs1[1]
        z1 = self.projector1(f1)
        
        outputs2 = self.bert(input_ids2, img_feats=img_feats2, attention_mask=attention_mask2, 
                position_ids=position_ids2, token_type_ids=token_type_ids2,
                head_mask=head_mask2, encoder_history_states=encoder_history_states2)
        f2 = outputs2[1]
        z2 = self.projector2(f2)

        loss = (self.compute_loss(z1, z2) / 2 + self.compute_loss(z2, z1) / 2)
        acc = self.compute_acc(z1, z2)
        return loss, acc

    def compute_loss(self, z1, z2, temperature=0.5):
        z1 = F.normalize(z1, dim=1)
        z2 = F.normalize(z2, dim=1)

        logits = F.cosine_similarity(z1.unsqueeze(1), z2.unsqueeze(0), dim=-1)
        logits /= temperature

        labels = torch.arange(z1.size(0), device=z1.device, dtype=torch.int64)

        loss = F.cross_entropy(logits, labels, reduction='mean')

        return loss

    def compute_acc(self, z1, z2):
        with torch.no_grad():
            z1 = F.normalize(z1, dim=1)
            z2 = F.normalize(z2, dim=1)
            similarity_matrix = F.cosine_similarity(z1.unsqueeze(1), z2.unsqueeze(0), dim=-1)
            labels = torch.arange(z1.size(0), dtype=torch.long).to(z1.device)
            pred = torch.argmax(similarity_matrix, dim=1)
            acc = torch.sum(pred == labels).item() / z1.size(0)
            return acc

class MoCo(nn.Module):
    """
    Build a MoCo model with: a query encoder, a key encoder, and a queue
    https://arxiv.org/abs/1911.05722
    """
    def __init__(self, base_encoder, dim=128, K=65536, m=0.999, T=0.07, mlp=False):
        """
        dim: feature dimension (default: 128)
        K: queue size; number of negative keys (default: 65536)
        m: moco momentum of updating key encoder (default: 0.999)
        T: softmax temperature (default: 0.07)
        """
        super(MoCo, self).__init__()

        self.K = K
        self.m = m
        self.T = T

        # create the encoders
        # num_classes is the output fc dimension
        self.encoder_q = base_encoder(num_classes=dim)
        self.encoder_k = base_encoder(num_classes=dim)

        if mlp:  # hack: brute-force replacement
            dim_mlp = self.encoder_q.fc.weight.shape[1]
            self.encoder_q.fc = nn.Sequential(nn.Linear(dim_mlp, dim_mlp), nn.ReLU(), self.encoder_q.fc)
            self.encoder_k.fc = nn.Sequential(nn.Linear(dim_mlp, dim_mlp), nn.ReLU(), self.encoder_k.fc)

        for param_q, param_k in zip(self.encoder_q.parameters(), self.encoder_k.parameters()):
            param_k.data.copy_(param_q.data)  # initialize
            param_k.requires_grad = False  # not update by gradient

        # create the queue
        self.register_buffer("queue", torch.randn(dim, K))
        self.queue = nn.functional.normalize(self.queue, dim=0)

        self.register_buffer("queue_ptr", torch.zeros(1, dtype=torch.long))

    @torch.no_grad()
    def _momentum_update_key_encoder(self):
        """
        Momentum update of the key encoder
        """
        for param_q, param_k in zip(self.encoder_q.parameters(), self.encoder_k.parameters()):
            param_k.data = param_k.data * self.m + param_q.data * (1. - self.m)

    @torch.no_grad()
    def _dequeue_and_enqueue(self, keys):
        # gather keys before updating queue
        keys = concat_all_gather(keys)

        batch_size = keys.shape[0]

        ptr = int(self.queue_ptr)
        assert self.K % batch_size == 0  # for simplicity

        # replace the keys at ptr (dequeue and enqueue)
        self.queue[:, ptr:ptr + batch_size] = keys.T
        ptr = (ptr + batch_size) % self.K  # move pointer

        self.queue_ptr[0] = ptr

    @torch.no_grad()
    def _batch_shuffle_ddp(self, x):
        """
        Batch shuffle, for making use of BatchNorm.
        *** Only support DistributedDataParallel (DDP) model. ***
        """
        # gather from all gpus
        batch_size_this = x.shape[0]
        x_gather = concat_all_gather(x)
        batch_size_all = x_gather.shape[0]

        num_gpus = batch_size_all // batch_size_this

        # random shuffle index
        idx_shuffle = torch.randperm(batch_size_all).cuda()

        # broadcast to all gpus
        torch.distributed.broadcast(idx_shuffle, src=0)

        # index for restoring
        idx_unshuffle = torch.argsort(idx_shuffle)

        # shuffled index for this gpu
        gpu_idx = torch.distributed.get_rank()
        idx_this = idx_shuffle.view(num_gpus, -1)[gpu_idx]

        return x_gather[idx_this], idx_unshuffle

    @torch.no_grad()
    def _batch_unshuffle_ddp(self, x, idx_unshuffle):
        """
        Undo batch shuffle.
        *** Only support DistributedDataParallel (DDP) model. ***
        """
        # gather from all gpus
        batch_size_this = x.shape[0]
        x_gather = concat_all_gather(x)
        batch_size_all = x_gather.shape[0]

        num_gpus = batch_size_all // batch_size_this

        # restored index for this gpu
        gpu_idx = torch.distributed.get_rank()
        idx_this = idx_unshuffle.view(num_gpus, -1)[gpu_idx]

        return x_gather[idx_this]

    def forward(self, im_q, im_k):
        """
        Input:
            im_q: a batch of query images
            im_k: a batch of key images
        Output:
            logits, targets
        """

        # compute query features
        q = self.encoder_q(im_q)  # queries: NxC
        q = nn.functional.normalize(q, dim=1)

        # compute key features
        with torch.no_grad():  # no gradient to keys
            self._momentum_update_key_encoder()  # update the key encoder

            # shuffle for making use of BN
            im_k, idx_unshuffle = self._batch_shuffle_ddp(im_k)

            k = self.encoder_k(im_k)  # keys: NxC
            k = nn.functional.normalize(k, dim=1)

            # undo shuffle
            k = self._batch_unshuffle_ddp(k, idx_unshuffle)

        # compute logits
        # Einstein sum is more intuitive
        # positive logits: Nx1
        l_pos = torch.einsum('nc,nc->n', [q, k]).unsqueeze(-1)
        # negative logits: NxK
        l_neg = torch.einsum('nc,ck->nk', [q, self.queue.clone().detach()])

        # logits: Nx(1+K)
        logits = torch.cat([l_pos, l_neg], dim=1)

        # apply temperature
        logits /= self.T

        # labels: positive key indicators
        labels = torch.zeros(logits.shape[0], dtype=torch.long).cuda()

        # dequeue and enqueue
        self._dequeue_and_enqueue(k)

        return logits, labels


# utils
@torch.no_grad()
def concat_all_gather(tensor):
    """
    Performs all_gather operation on the provided tensors.
    *** Warning ***: torch.distributed.all_gather has no gradient.
    """
    tensors_gather = [torch.ones_like(tensor)
        for _ in range(torch.distributed.get_world_size())]
    torch.distributed.all_gather(tensors_gather, tensor, async_op=False)

    output = torch.cat(tensors_gather, dim=0)
    return output
