# Supplementary material
Source: ML conference proceedings conference paper supplement (https://proceedings.neurips.cc/paper_files/paper/2022/hash/2a8e6c09a1fd747e43a74710c79efdd5-Abstract.html)
Supplement: Supplementary file 1 [file 2a8e6c09a1fd747e43a74710c79efdd5-Supplemental-Conference.zip › p2c/run_vivo_pretrain.py]

from __future__ import absolute_import, division, print_function

import argparse
import datetime
import json
import logging
import os
import random
import sys
import time
import math
import shutil

sys.path.insert(0, '.')

import numpy as np
import torch

from oscar.modeling.modeling_bert import BertForTagPreTraining
from transformers.pytorch_transformers import (WEIGHTS_NAME, BertConfig,
                                  BertTokenizer)

from oscar.datasets.build import make_data_loader

from transformers.pytorch_transformers import AdamW, WarmupLinearSchedule
from oscar.utils.misc import mkdir, get_rank
from oscar.utils.metric_logger import TensorboardLogger

logger = logging.getLogger(__name__)

ALL_MODELS = sum((tuple(conf.pretrained_config_archive_map.keys()) for conf in (BertConfig,)), ())

MODEL_CLASSES = {
    'bert': (BertConfig, BertForTagPreTraining, BertTokenizer),
}


""" ****** Pretraining ****** """


def main():
    parser = argparse.ArgumentParser()

    ## Required parameters
    parser.add_argument("--data_dir", default=None, type=str, required=False,
                        help="The input data dir. "
                             "Should contain the .yaml files for the task.")
    parser.add_argument("--dataset_file", default=None, type=str, required=True,
                        help="The training dataset yaml file.")
    parser.add_argument("--extra_dataset_file", default=None, type=str, required=False,
                        help="The extra training dataset yaml file.")
    parser.add_argument("--bert_model", default=None, type=str, required=True,
                        help="Bert pre-trained model selected in the list: bert-base-uncased, "
                             "bert-large-uncased, bert-base-cased, bert-base-multilingual, bert-base-chinese.")
    parser.add_argument("--output_dir", default=None, type=str, required=True,
                        help="The output directory where the model checkpoints will be written.")

    # image chunks
    parser.add_argument("--chunk_start_id", default=-1, type=int,
                        help="Image Chunk Start ID")
    parser.add_argument("--chunk_end_id", default=-1, type=int,
                        help="Image Chunk End ID")

    ## Image parameters
    parser.add_argument("--max_img_seq_length", default=50, type=int,
                        help="The maximum total input image sequence length.")
    parser.add_argument("--img_feature_dim", default=2054, type=int,
                        help="The Image Feature Dimension.")
    parser.add_argument("--img_feature_type", default='faster_r-cnn', type=str,
                        help="faster_r-cnn or mask_r-cnn")
    parser.add_argument("--use_layernorm", action='store_true',
                        help="use_layernorm")

    parser.add_argument("--drop_out", default=0.1, type=float,
                        help="Drop out for BERT.")

    parser.add_argument("--use_b", type=int, default=1, help="use_b")
    parser.add_argument("--textb_sample_mode", type=int, default=0,
                        help="0: sample from both texta&textb, "
                             "1: sample from textb, "
                             "2: sample from QA answers")
    parser.add_argument("--extra_textb_sample_mode", type=int, default=1)
    parser.add_argument("--texta_false_prob", type=float, default=0.0,
                        help="the probality that we sample wrong texta, should in [0.0, 0.5]")

    parser.add_argument("--model_name_or_path", default=None, type=str,
                        required=True,
                        help="Path to pre-trained model or shortcut name selected in the list: " + ", ".join(
                            ALL_MODELS))
    parser.add_argument("--config_name", default="", type=str,
                        help="Pretrained config name or path if not the same as model_name")
    parser.add_argument("--tokenizer_name", default="", type=str,
                        help="Pretrained tokenizer name or path if not the same as model_name")
    parser.add_argument("--cache_dir", default="", type=str,
                        help="Where do you want to store the pre-trained models downloaded from s3")

    parser.add_argument("--max_seq_length", default=35, type=int,
                        help="The maximum total input sequence length after WordPiece tokenization. \n"
                             "Sequences longer than this will be truncated, and sequences shorter than this will be padded.")
    parser.add_argument("--do_train", action='store_true',
                        help="Whether to run training.")
    parser.add_argument("--learning_rate", default=5e-5, type=float,
                        help="The initial learning rate for Adam.")
    parser.add_argument("--max_iters", default=2000000, type=int,
                        help="Maximal number of training iterations.")
    parser.add_argument("--train_batch_size", default=1024, type=int,
                        help="Batch size for training.")
    parser.add_argument("--num_workers", default=6, type=int,
                        help="Number of workers for dataset.")
    parser.add_argument("--adam_epsilon", default=1e-8, type=float,
                        help="Epsilon for Adam optimizer.")
    parser.add_argument("--optim", default='adamw', type=str,
                        help="The optimizer used for Bert, [adamw, lamb], default: adamw")
    parser.add_argument("--max_grad_norm", default=-1.0, type=float, help="Max gradient norm.")
    parser.add_argument("--warmup_steps", default=0, type=int,
                        help="Linear warmup over warmup_steps.")
    parser.add_argument("--no_cuda", action='store_true',
                        help="Whether not to use CUDA when available")
    parser.add_argument("--on_memory", action='store_true',
                        help="Whether to load train samples into memory or use disk")
    parser.add_argument("--do_lower_case", action='store_true',
                        help="Whether to lower case the input text. True for uncased models, False for cased models.")
    parser.add_argument("--local_rank", type=int, default=-1,
                        help="local_rank for distributed training on gpus")
    parser.add_argument('--seed', type=int, default=42,
                        help="random seed for initialization")
    parser.add_argument('--gradient_accumulation_steps', type=int, default=1,
                        help="Number of updates steps to accumualte before performing a backward/update pass.")

    parser.add_argument("--from_scratch", action='store_true',
                        help="train from scratch")
    parser.add_argument("--use_img_layernorm", type=int, default=0,
                        help="Normalize image features with bertlayernorm")
    parser.add_argument("--img_layer_norm_eps", default=1e-12, type=float,
                        help="The eps in image feature laynorm layer")
    # distributed
    parser.add_argument('--gpu_ids', type=str, default='-1')
    parser.add_argument("--mask_loss_for_unmatched", type=int, default=1,
                        help="masked language model loss for unmatched triplets")
    parser.add_argument("--extra_loss_weight", type=float, default=0.0,
                        help="the loss weight for the extra train data batch (should be in [0,1])")
    parser.add_argument(
        "--use_gtlabels",
        type=int, default=1,
        help="use groundtruth labels for text b or not"
    )
    # logging
    parser.add_argument('--ckpt_period', type=int, default=10000,
                        help="Period for saving checkpoint")
    parser.add_argument('--log_period', type=int, default=100,
                        help="Period for saving logging info")
    args = parser.parse_args()

    if args.gpu_ids != '-1':
        os.environ["CUDA_VISIBLE_DEVICES"] = args.gpu_ids

    args.num_gpus = int(
        os.environ["WORLD_SIZE"]) if "WORLD_SIZE" in os.environ else 1
    args.distributed = args.num_gpus > 1

    if args.gpu_ids != '-1':
        os.environ["CUDA_VISIBLE_DEVICES"] = args.gpu_ids

    if os.path.exists(args.output_dir) and os.listdir(args.output_dir) and args.do_train:
        logger.info("Output Directory Exists.")

    # Setup CUDA, GPU & distributed training
    if args.local_rank == -1 or args.no_cuda:
        device = torch.device(
            "cuda" if torch.cuda.is_available() and not args.no_cuda else "cpu")
        args.n_gpu = torch.cuda.device_count()
    else:  # Initializes the distributed backend which will take care of sychronizing nodes/GPUs
        torch.cuda.set_device(args.local_rank)
        device = torch.device("cuda", args.local_rank)
        torch.distributed.init_process_group(
            backend='nccl', init_method="env://"
        )
        args.n_gpu = 1
    args.device = device

    # Setup logging
    logging.basicConfig(
        format='%(asctime)s - %(levelname)s - %(name)s - %(message)s',
        datefmt='%m/%d/%Y %H:%M:%S',
        level=logging.INFO if args.local_rank in [-1, 0] else logging.WARN)
    logger.warning(
        "Process rank: %s, device: %s, n_gpu: %s, distributed training: %s",
        args.local_rank, device, args.n_gpu, bool(args.local_rank != -1)
    )

    if args.gradient_accumulation_steps < 1:
        raise ValueError(
            "Invalid gradient_accumulation_steps parameter: {}, should be >= 1".format(
                args.gradient_accumulation_steps))

    random.seed(args.seed)
    np.random.seed(args.seed)
    torch.manual_seed(args.seed)
    if args.n_gpu > 0:
        torch.cuda.manual_seed_all(args.seed)

    if not args.do_train:
        raise ValueError(
            "Training is currently the only implemented execution option. Please set `do_train`.")

    if not os.path.exists(args.output_dir):
        mkdir(args.output_dir)

    last_checkpoint_dir = None
    arguments = {"iteration": 0}
    if os.path.exists(args.output_dir):
        save_file = os.path.join(args.output_dir, "last_checkpoint")
        try:
            with open(save_file, "r") as f:
                last_saved = f.read()
                last_saved = last_saved.strip()
        except IOError:
            # if file doesn't exist, maybe because it has just been
            # deleted by a separate process
            last_saved = ""
        if last_saved:
            folder_name = os.path.splitext(last_saved.split('/')[0])[0] # in the form of checkpoint-00001 or checkpoint-00001/pytorch_model.bin
            last_checkpoint_dir = os.path.join(args.output_dir, folder_name)
            arguments["iteration"] = int(folder_name.split('-')[-1])
            assert os.path.isfile(os.path.join(last_checkpoint_dir, WEIGHTS_NAME)), "Last_checkpoint detected, but file not found!"

    # model first
    if get_rank() != 0:
        torch.distributed.barrier()
    config_class, model_class, tokenizer_class = MODEL_CLASSES[args.bert_model]
    if last_checkpoint_dir is not None:  # recovery
        args.model_name_or_path = last_checkpoint_dir
        logger.info(" -> Recovering model from {}".format(last_checkpoint_dir))

    config = config_class.from_pretrained(
        args.config_name if args.config_name else args.model_name_or_path,
    )
    config.img_layer_norm_eps = args.img_layer_norm_eps
    config.use_img_layernorm = args.use_img_layernorm

    # discrete code
    config.img_feature_dim = args.img_feature_dim
    config.img_feature_type = args.img_feature_type
    config.hidden_dropout_prob = args.drop_out
    if args.texta_false_prob < 0.5 and (args.texta_false_prob > 0 or not args.use_b):
        args.num_contrast_classes = 3
    else:
        args.num_contrast_classes = 2
    config.num_contrast_classes = args.num_contrast_classes

    # Prepare model
    # model = BertForPreTraining.from_pretrained(args.bert_model)
    load_num = 0
    while load_num < 10:
        try:
            model = BertForTagPreTraining.from_pretrained(
                args.model_name_or_path,
                from_tf=bool('.ckpt' in args.model_name_or_path),
                config=config)
            break
        except:
            load_num += 1

    # train from scratch
    if args.from_scratch:
        if last_checkpoint_dir is None:
            logger.info("Training from scratch ... ")
            model.apply(model.init_weights)
    total_params = sum(p.numel() for p in model.parameters())
    logger.info(
        'Total Parameters: {}'.format(total_params))

    for key, val in vars(config).items():
        setattr(args, key, val)

    if get_rank() == 0 and args.local_rank != -1:
        torch.distributed.barrier()

    model.to(args.device)

    logger.info("Training/evaluation parameters %s", args)

    tb_log_dir = os.path.join(args.output_dir, 'train_logs')
    meters = TensorboardLogger(
        log_dir=tb_log_dir,
        delimiter="  ",
    )

    # Prepare optimizer
    param_optimizer = list(model.named_parameters())
    no_decay = ['bias', 'LayerNorm.bias', 'LayerNorm.weight']
    optimizer_grouped_parameters = [
        {'params': [p for n, p in param_optimizer if
                    not any(nd in n for nd in no_decay)],
         'weight_decay': 0.01},
        {'params': [p for n, p in param_optimizer if
                    any(nd in n for nd in no_decay)], 'weight_decay': 0.0}
    ]

    optimizer = AdamW(optimizer_grouped_parameters,
                              lr=args.learning_rate, eps=args.adam_epsilon)
    scheduler = WarmupLinearSchedule(optimizer,
                                     warmup_steps=args.warmup_steps,
                                     t_total=args.max_iters)

    if arguments['iteration'] > 0 and os.path.isfile(os.path.join(last_checkpoint_dir, 'optimizer.pth')):  # recovery
        logger.info(
            "Load BERT optimizer from {}".format(last_checkpoint_dir))
        optimizer_to_load = torch.load(
            os.path.join(last_checkpoint_dir, 'optimizer.pth'),
            map_location=torch.device("cpu"))
        optimizer.load_state_dict(optimizer_to_load.pop("optimizer"))
        scheduler.load_state_dict(optimizer_to_load.pop("scheduler"))

    if args.distributed:
        model = torch.nn.parallel.DistributedDataParallel(
            model, device_ids=[args.local_rank], output_device=args.local_rank,
            find_unused_parameters=True)
    elif args.n_gpu > 1:
        model = torch.nn.DataParallel(model)

    # train_examples = None
    train_dataloaders = make_data_loader(
        args, is_distributed=args.distributed, arguments=arguments
    )

    if isinstance(train_dataloaders, list):
        train_dataloader = train_dataloaders[0]
    else:
        train_dataloader = train_dataloaders
    train_dataloader_extra = [None] * len(train_dataloader)
    if isinstance(train_dataloaders, list) and len(train_dataloaders) > 1:
        logger.info("Having two train dataloaders!")
        train_dataloader_extra = train_dataloaders[1]
    tokenizer = train_dataloader.dataset.tokenizer

    # torch.backends.cudnn.benchmark = True

    max_iter = len(train_dataloader)
    start_iter = arguments["iteration"]
    logger.info("***** Running training *****")
    logger.info(" Num examples = {}".format(len(train_dataloader.dataset)))
    logger.info("  Instantaneous batch size = %d",
                args.train_batch_size // args.gradient_accumulation_steps)
    logger.info(
        "  Total train batch size (w. parallel, distributed & accumulation) = %d",
        args.train_batch_size)
    logger.info("  Gradient Accumulation steps = %d",
                args.gradient_accumulation_steps)
    logger.info("  Total optimization steps = %d",
                max_iter // args.gradient_accumulation_steps)

    log_json = {}

    model.train()
    model.zero_grad()

    clock_started = False
    # Every args.ckpt_period, report train_score and save model
    tr_loss = 0
    nb_tr_examples, nb_tr_steps = 0, 0
    for step, (batch, batch_extra) in enumerate(zip(train_dataloader, train_dataloader_extra), start_iter):
        if not clock_started:
            start_training_time = time.time()
            end = time.time()
            clock_started = True

        def data_process(mini_batch):
            images, targets, qa_inds = \
                mini_batch[0], mini_batch[1], mini_batch[2]
            targets_transposed = list(zip(*targets))
            input_ids = torch.stack(targets_transposed[0]).to(args.device, non_blocking=True)
            input_mask = torch.stack(targets_transposed[1]).to(args.device, non_blocking=True)
            segment_ids = torch.stack(targets_transposed[2]).to(args.device, non_blocking=True)
            lm_label_ids = torch.stack(targets_transposed[3]).to(args.device, non_blocking=True)

            return images, input_ids, input_mask, segment_ids, lm_label_ids

        images1, input_ids1, input_mask1, segment_ids1, lm_label_ids1 = data_process(batch)

        if batch_extra is not None:
            images2, input_ids2, input_mask2, segment_ids2, lm_label_ids2 = data_process(batch_extra)

        data_time = time.time() - end

        def forward_backward(images, input_ids, input_mask, segment_ids,
                             lm_label_ids, loss_weight=1.0):
            # feature as input
            image_features = torch.stack(images).to(args.device, non_blocking=True)

            outputs = model(input_ids, segment_ids, input_mask,
                            lm_label_ids, img_feats=image_features)

            loss = loss_weight * outputs[0]

            if args.n_gpu > 1:
                loss = loss.mean()  # mean() to average on multi-gpu.

            if args.gradient_accumulation_steps > 1:
                loss = loss / args.gradient_accumulation_steps
            loss.backward()

            return loss.item(), input_ids.size(0)

        start1 = time.time()
        loss1, nb_tr_example1 = forward_backward(
            images1, input_ids1, input_mask1,
            segment_ids1, lm_label_ids1,
            loss_weight=1.0-args.extra_loss_weight
        )
        tr_loss += loss1
        nb_tr_examples += nb_tr_example1
        compute_time1 = time.time() - start1

        loss2, nb_tr_example2 = 0.0, 0
        compute_time2 = 0.0
        if batch_extra is not None:
            start2 = time.time()
            loss2, nb_tr_example2 = forward_backward(
                images2, input_ids2, input_mask2,
                segment_ids2, lm_label_ids2, 
                loss_weight=args.extra_loss_weight
            )
            tr_loss += loss2
            nb_tr_examples += nb_tr_example2
            compute_time2 = time.time() - start2

        nb_tr_steps += 1
        arguments["iteration"] = step + 1

        if (step + 1) % args.gradient_accumulation_steps == 0:
            # do gradient clipping
            if args.max_grad_norm > 0:
                torch.nn.utils.clip_grad_norm_(model.parameters(), args.max_grad_norm)
            # do the optimization steps
            optimizer.step()
            scheduler.step()  # Update learning rate schedule
            optimizer.zero_grad()

            # measure elapsed time
            batch_time = time.time() - end
            end = time.time()
            metrics_to_log = {
                'time_info': {'compute': batch_time, 'data': data_time,
                              'compute1': compute_time1,
                              'compute2': compute_time2},
                'batch_metrics': {'loss': loss1+loss2}
            }
            params_to_log = {'params': {'bert_lr': optimizer.param_groups[0]["lr"]}}
            meters.update_metrics(metrics_to_log)
            meters.update_params(params_to_log)

            if args.log_period > 0 and (step + 1) % args.log_period == 0:
                avg_time = meters.meters['time_info']['compute'].global_avg
                eta_seconds = avg_time * (max_iter - step - 1)
                eta_string = str(
                    datetime.timedelta(seconds=int(eta_seconds)))
                logger.info(
                    meters.delimiter.join(
                        [
                            "eta: {eta}",
                            "iter: {iter}",
                            "max mem: {memory:.0f}",
                        ]
                    ).format(
                        eta=eta_string,
                        iter=step + 1,
                        memory=torch.cuda.max_memory_allocated() / 1024.0 / 1024.0,
                    ) + "\n    " + meters.get_logs(step + 1)
                )

        if (step + 1) == max_iter or (step + 1) % args.ckpt_period == 0:  # Save a trained model
            log_json[step+1] = tr_loss
            train_metrics_total = torch.Tensor([tr_loss, nb_tr_examples, nb_tr_steps]).to(args.device)
            torch.distributed.all_reduce(train_metrics_total)
            # reset metrics
            tr_loss = 0
            nb_tr_examples, nb_tr_steps = 0, 0

            if get_rank() == 0:
                # report metrics
                train_score_gathered = train_metrics_total[0] / \
                                       train_metrics_total[2]
                logger.info("PROGRESS: {}%".format(
                    round(100 * (step + 1) / max_iter, 4)))
                logger.info(
                    "EVALERR: {}%".format(train_score_gathered))
                meters.update_metrics(
                    {
                        'epoch_metrics': {'ex_cnt': train_metrics_total[1],
                                          'loss': train_score_gathered}
                    }
                )
                with open(os.path.join(args.output_dir, 'loss_logs.json'),
                          'w') as fp:
                    json.dump(log_json, fp)

                # save checkpoint
                output_dir = os.path.join(args.output_dir,
                                          'checkpoint-{:07d}'.format(
                                              step + 1))
                if not os.path.exists(output_dir):
                    os.makedirs(output_dir)
                model_to_save = model.module if hasattr(
                    model,
                    'module') else model  # Take care of distributed/parallel training
                optimizer_to_save = {
                    "optimizer": optimizer.state_dict(),
                    "scheduler": scheduler.state_dict()}

                save_num = 0
                while save_num < 10:
                    try:
                        model_to_save.save_pretrained(output_dir)
                        torch.save(args, os.path.join(output_dir,
                                                      'training_args.bin'))
                        tokenizer.save_pretrained(output_dir)
                        torch.save(optimizer_to_save,
                                   os.path.join(output_dir,
                                                'optimizer.pth'))
                        save_file = os.path.join(args.output_dir, "last_checkpoint")
                        with open(save_file, "w") as f:
                            f.write('checkpoint-{:07d}/pytorch_model.bin'.format(step + 1))
                        break
                    except:
                        save_num += 1
                logger.info(
                    "Saving model checkpoint {0} to {1}".format(
                        step + 1, output_dir))

    if clock_started:
        total_training_time = time.time() - start_training_time
    else:
        total_training_time = 0.0
    total_time_str = str(datetime.timedelta(seconds=total_training_time))
    logger.info(
        "Total training time: {} ({:.4f} s / it)".format(
            total_time_str, total_training_time / max_iter
        )
    )
    # close the tb logger
    meters.close()


if __name__ == "__main__":
    main()
