# Supplementary material
Source: ML conference proceedings conference paper supplement (https://proceedings.neurips.cc/paper_files/paper/2022/hash/2a8e6c09a1fd747e43a74710c79efdd5-Abstract.html)
Supplement: Supplementary file 1 [file 2a8e6c09a1fd747e43a74710c79efdd5-Supplemental-Conference.zip › p2c/scripts/inference.sh]

python -m torch.distributed.launch --nproc_per_node=2 run_captioning.py \
    --eval_model_dir CHECKPOINT_DIR \
    --data_dir PATH_TO_NOCAPS_DIR \
    --do_eval \
    --do_lower_case \
    --add_od_labels \
    --learning_rate 0.00003 \
    --per_gpu_train_batch_size 16 \
    --per_gpu_eval_batch_size 16 \
    --max_gen_length 20 \
    --num_beams 5 \
    --num_train_epochs 10 \
    --save_steps 100 \
    --output_dir output/nocaps/ \
    --logging_steps 100 \
    --repetition_penalty 1.0
