# Supplementary material
Source: ML conference proceedings conference paper supplement (https://proceedings.neurips.cc/paper_files/paper/2022/hash/2a8e6c09a1fd747e43a74710c79efdd5-Abstract.html)
Supplement: Supplementary file 1 [file 2a8e6c09a1fd747e43a74710c79efdd5-Supplemental-Conference.zip › p2c/scripts/xe.sh]

python -m torch.distributed.launch --nproc_per_node=4 run_captioning.py \
    --model_name_or_path YOUR_CHECKPOINT_FROM_VIVO \
    --data_dir PATH_TO_COCO_DIR \
    --do_lower_case \
    --do_train \
    --add_od_labels \
    --learning_rate 5e-05 \
    --per_gpu_train_batch_size 64 \
    --num_train_epochs 30 \
    --tie_weights \
    --freeze_embedding \
    --output_dir output/xe/ \
    --logging_steps 1000 \
    --save_steps 5000 \
