# Supplementary material
Source: ML conference proceedings conference paper supplement (https://proceedings.neurips.cc/paper_files/paper/2022/hash/2a8e6c09a1fd747e43a74710c79efdd5-Abstract.html)
Supplement: Supplementary file 1 [file 2a8e6c09a1fd747e43a74710c79efdd5-Supplemental-Conference.zip › p2c/utils/tsv_file.py]

# Copyright (c) 2020 Microsoft Corporation. Licensed under the MIT license. 

import logging
import os
import os.path as op


def generate_lineidx_file(filein, idxout):
    idxout_tmp = idxout + '.tmp'
    with open(filein, 'r') as tsvin, open(idxout_tmp,'w') as tsvout:
        fsize = os.fstat(tsvin.fileno()).st_size
        fpos = 0
        while fpos!=fsize:
            tsvout.write(str(fpos)+"\n")
            tsvin.readline()
            fpos = tsvin.tell()
    os.rename(idxout_tmp, idxout)


class TSVFile(object):
    def __init__(self, tsv_file, generate_lineidx=False):
        self.tsv_file = tsv_file
        self.lineidx = op.splitext(tsv_file)[0] + '.lineidx'
        self._fp = None
        self._lineidx = None
        # the process always keeps the process which opens the file. 
        # If the pid is not equal to the currrent pid, we will re-open the file.
        self.pid = None
        # generate lineidx if not exist
        if not op.isfile(self.lineidx) and generate_lineidx:
            generate_lineidx_file(self.tsv_file, self.lineidx)

    def __del__(self):
        if self._fp:
            self._fp.close()

    def __str__(self):
        return "TSVFile(tsv_file='{}')".format(self.tsv_file)

    def __repr__(self):
        return str(self)

    def num_rows(self):
        self._ensure_lineidx_loaded()
        return len(self._lineidx)

    def seek(self, idx):
        self._ensure_tsv_opened()
        self._ensure_lineidx_loaded()
        try:
            pos = self._lineidx[idx]
        except:
            logging.info('{}-{}'.format(self.tsv_file, idx))
            raise
        self._fp.seek(pos)
        return [s.strip() for s in self._fp.readline().split('\t')]

    def seek_first_column(self, idx):
        self._ensure_tsv_opened()
        self._ensure_lineidx_loaded()
        pos = self._lineidx[idx]
        self._fp.seek(pos)
        return read_to_character(self._fp, '\t')

    def __getitem__(self, index):
        return self.seek(index)

    def __len__(self):
        return self.num_rows()

    def _ensure_lineidx_loaded(self):
        if self._lineidx is None:
            logging.info('loading lineidx: {}'.format(self.lineidx))
            with open(self.lineidx, 'r') as fp:
                self._lineidx = [int(i.strip()) for i in fp.readlines()]

    def _ensure_tsv_opened(self):
        if self._fp is None:
            self._fp = open(self.tsv_file, 'r')
            self.pid = os.getpid()

        if self.pid != os.getpid():
            logging.info('re-open {} because the process id changed'.format(self.tsv_file))
            self._fp = open(self.tsv_file, 'r')
            self.pid = os.getpid()
